# Supplementary material
Source: PubMed Central journal article supplement (PMC5351781)

**A** Common deregulated genes in both REH and SEM by IRAK1/4 inhibitor

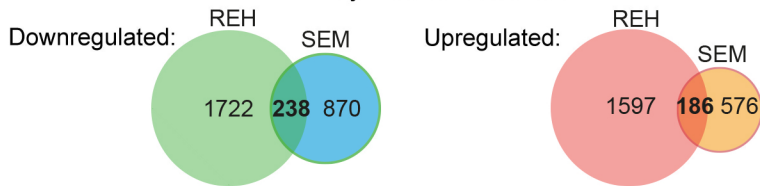

**B**

**Downregulated:**

| Category                | Description                            | LogP     | Log(q-value) |
|-------------------------|----------------------------------------|----------|--------------|
| Hallmark Gene Sets      | HALLMARK MITOTIC SPINDLE               | -9.29572 | -5.225       |
| GO Biological Processes | cell-substrate adhesion                | -9.1068  | -5.225       |
| GO Biological Processes | actin filament-based process           | -7.20368 | -3.535       |
| GO Biological Processes | positive regulation of GTPase activity | -6.78185 | -3.389       |

**Upregulated:**

| Category                | Description                                | LogP      | Log(q-value) |
|-------------------------|--------------------------------------------|-----------|--------------|
| GO Biological Processes | serine family amino acid metabolic process | -21.12089 | -17.231      |
| GO Biological Processes | PERK-mediated unfolded protein response    | -6.694574 | -4.155       |

**D** Gene ontology of SEM-specific downregulated genes by both IRAK inhibitors

| Category                | Term       | Description                                  | LogP      | Log(q-value) |
|-------------------------|------------|----------------------------------------------|-----------|--------------|
| GO Biological Processes | GO:0001775 | cell activation                              | -12.85271 | -8.67015     |
| GO Biological Processes | GO:0007229 | integrin-mediated signaling pathway          | -8.653644 | -5.425329    |
| GO Biological Processes | GO:0031589 | cell-substrate adhesion                      | -8.528502 | -5.410795    |
| GO Biological Processes | GO:0071363 | cellular response to growth factor stimulus  | -8.264287 | -5.227858    |
| GO Biological Processes | GO:0008284 | positive regulation of cell proliferation    | -7.611808 | -4.771673    |
| GO Biological Processes | GO:0002684 | positive regulation of immune system process | -7.374484 | -4.623291    |
| GO Biological Processes | GO:0030029 | actin filament-based process                 | -6.874054 | -4.182858    |
| KEGG Pathway            | hsa05202   | transcriptional misregulation in cancer      | -7.336477 | -4.601078    |
| Hallmark Gene Sets      | M5890      | HALLMARK TNFA SIGNALING VIA NFKB             | -8.573492 | -5.410795    |
| Hallmark Gene Sets      | M5947      | HALLMARK IL2 STAT5 SIGNALING                 | -7.655786 | -4.795448    |

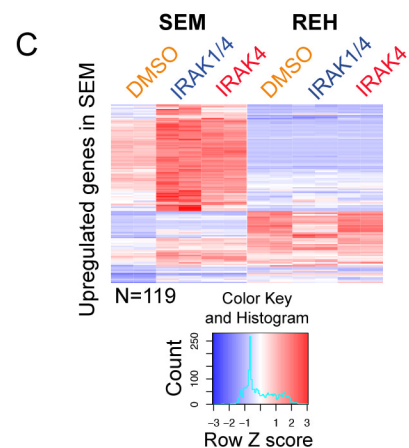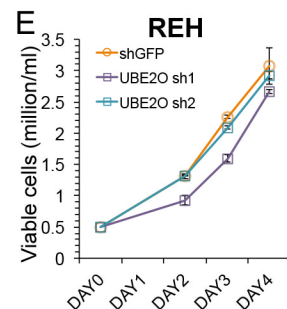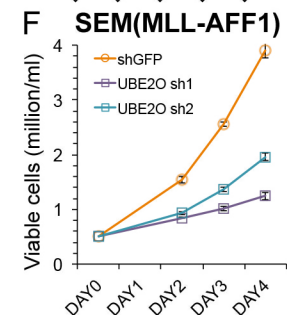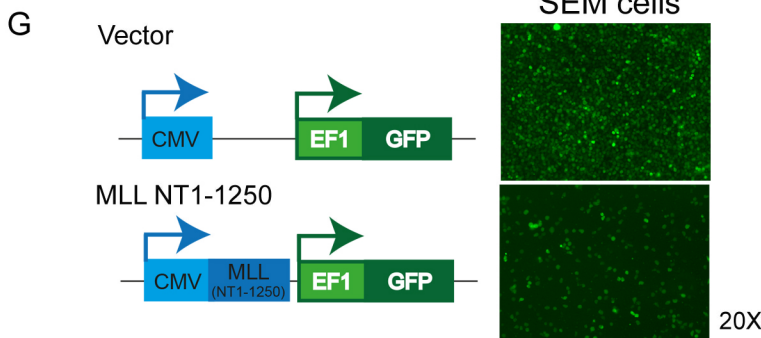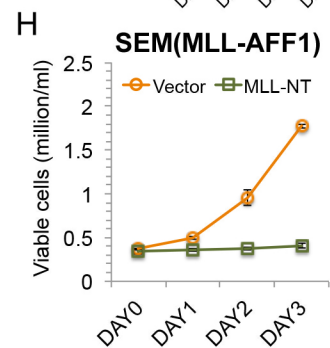

Supplement: NIHMS835871-supplement-4.pdf [file NIHMS835871-supplement-4.pdf]
