# Supplementary material
Source: PubMed Central journal article supplement (PMC5351781)

A

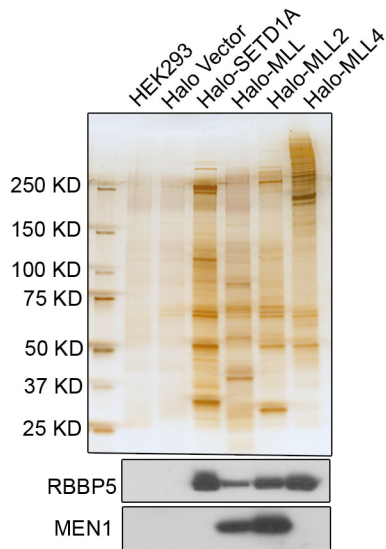

B

MudPIT analysis of Halo-MLL Complexes

| dNSAF | Vector | Halo-MLL1  |
|-------|--------|------------|
| MLL1  | 0      | 0.00749    |
| RBBP5 | 0      | 0.000113   |
| ASH2L | 0      | 0.0000969  |
| DPY30 | 0      | 0.00276    |
| WDR5  | 0      | 0.00009114 |
| HCFC1 | 0      | 0.0000374  |
| Menin | 0      | 0.000973   |
| CXXC1 | 0      | 0          |
| WDR82 | 0      | 0          |

E Enriched pathways in shRNA screening for MLL degradation

| Molecular Function                     | Fold Enrichment | P value  |
|----------------------------------------|-----------------|----------|
| <b>Interleukin-1 receptor activity</b> | > 5             | 7.50E-03 |
| <b>Cytokine receptor activity</b>      | > 5             | 1.53E-04 |

  

| Biological Process                   | Fold Enrichment | P value  |
|--------------------------------------|-----------------|----------|
| <b>Regulation of immune response</b> | 2.46            | 3.59E-02 |
| <b>Immune response</b>               | 2.43            | 1.38E-04 |

C

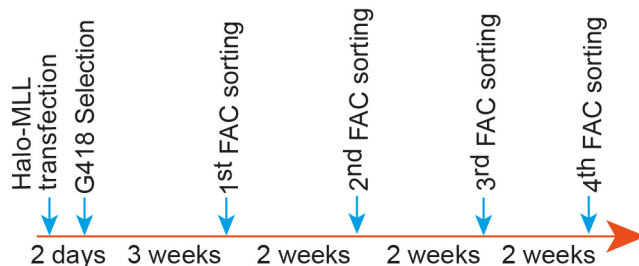

D

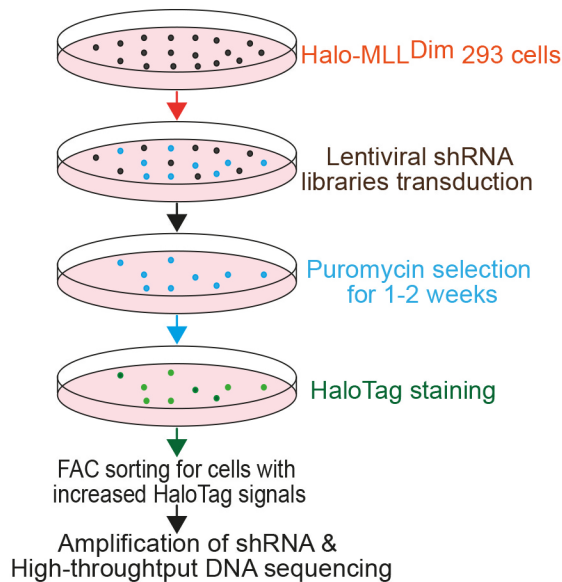

F

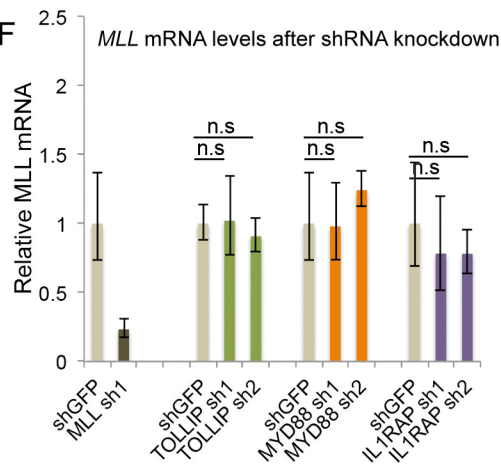

Supplement: NIHMS835871-supplement-2.pdf [file NIHMS835871-supplement-2.pdf]
