# Supplementary material
Source: PubMed Central journal article supplement (PMC5351781)

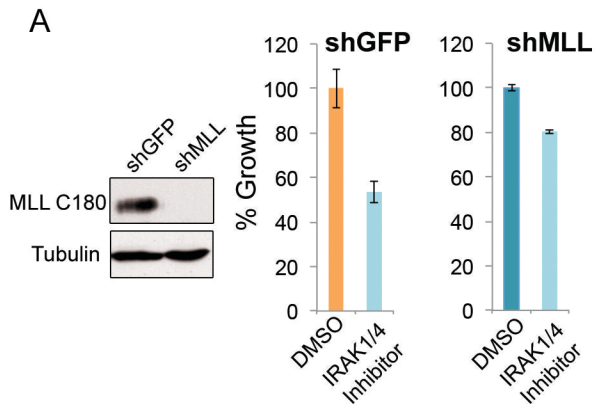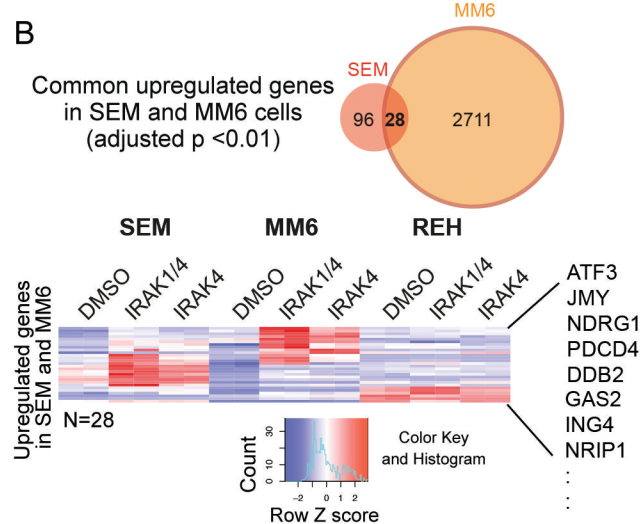

**C** TARGET childhood ALL (COG, POG 9906)

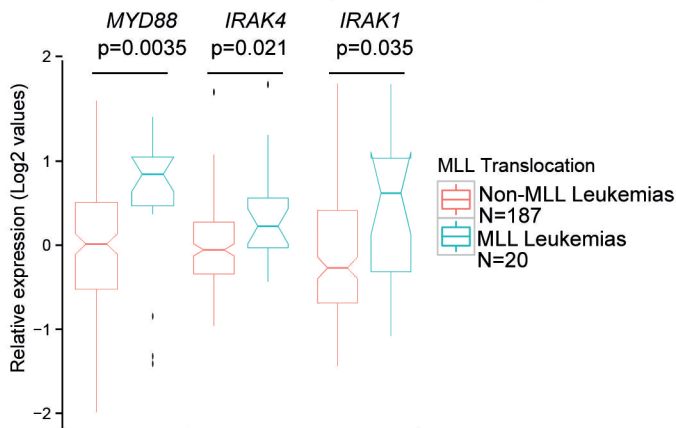

**D** mRNA Expression of *Irak1* and *Irak4* in MLL-AF9 mouse model of leukemia (Liu et al., 2014)

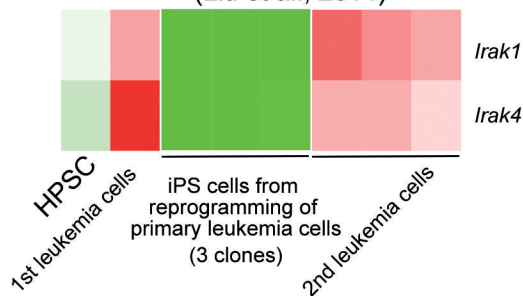

Supplement: NIHMS835871-supplement-5.pdf [file NIHMS835871-supplement-5.pdf]
