# Supplementary material
Source: PubMed Central journal article supplement (PMC5351781)

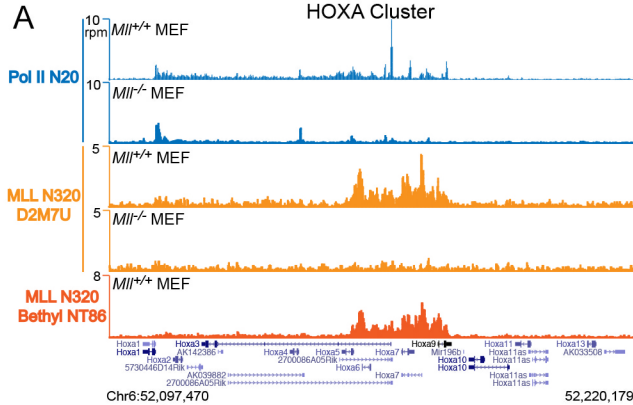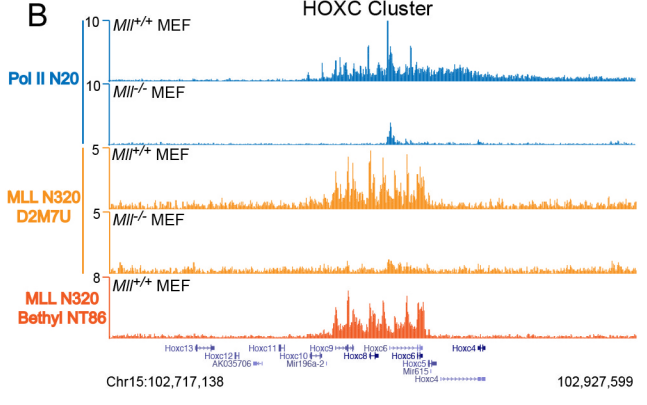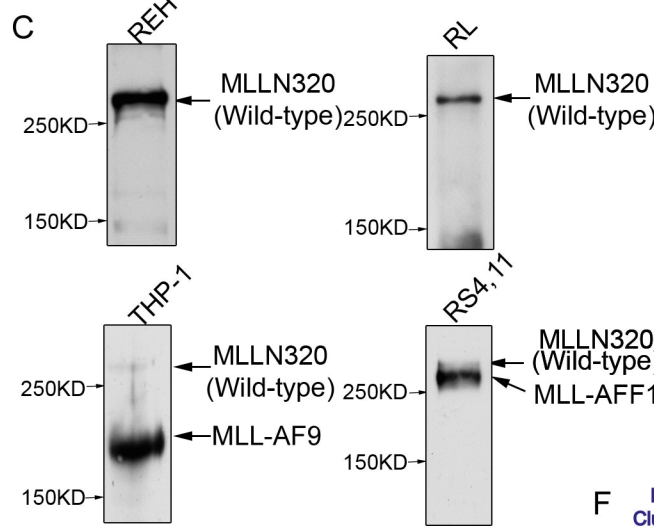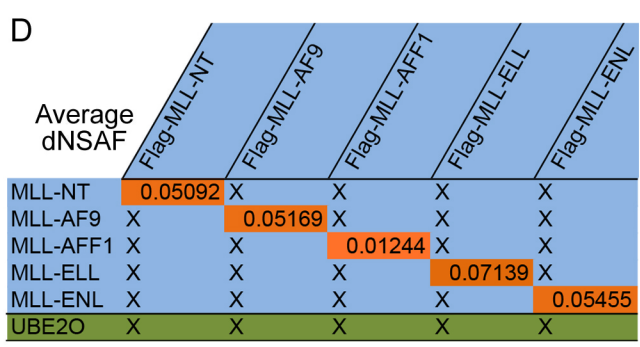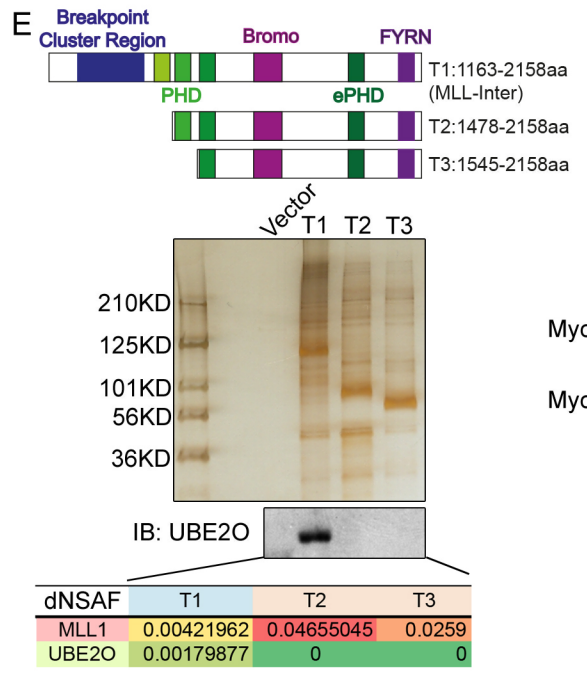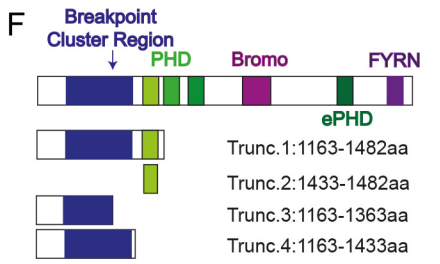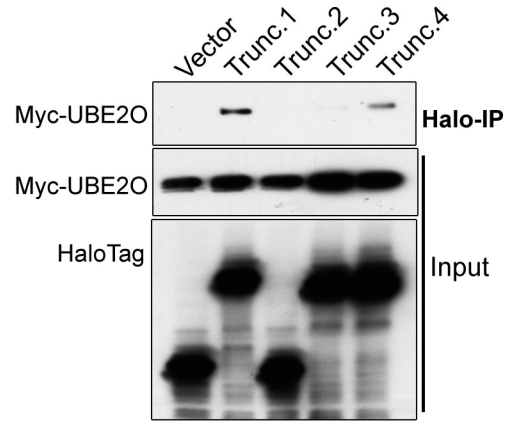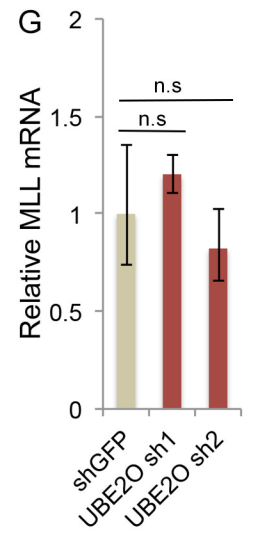

Supplement: NIHMS835871-supplement-1.pdf [file NIHMS835871-supplement-1.pdf]

A

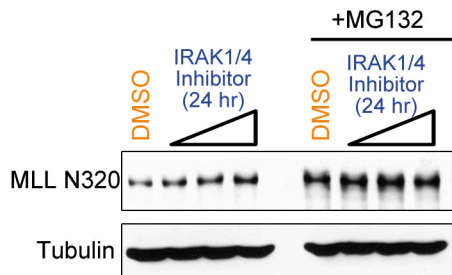

B

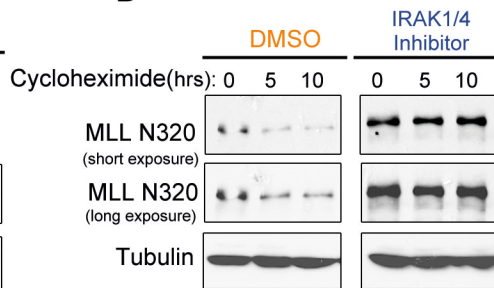

C

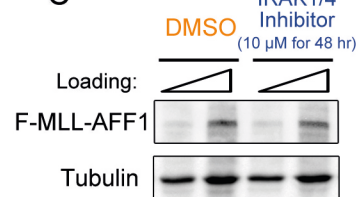

D

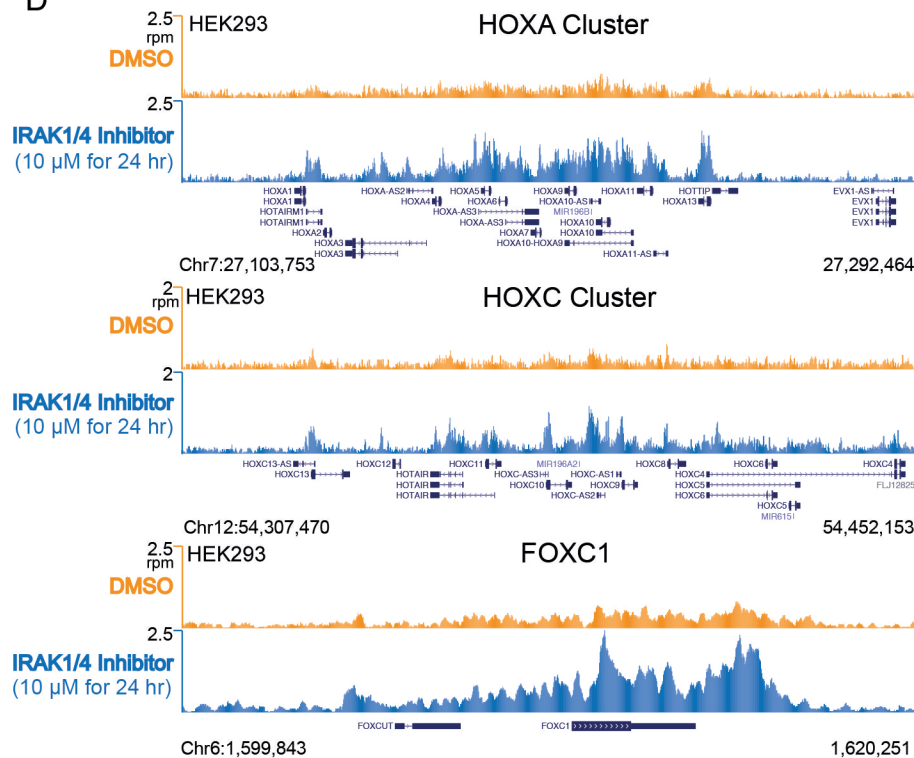

E

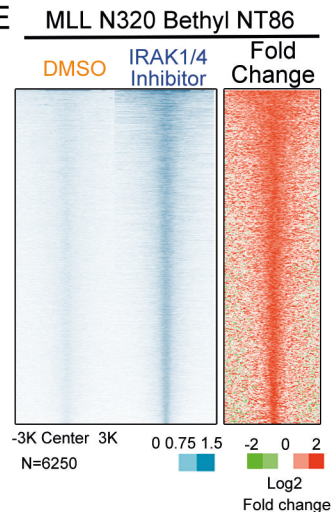

F

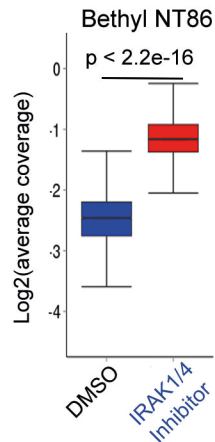

Supplement: NIHMS835871-supplement-3.pdf [file NIHMS835871-supplement-3.pdf]

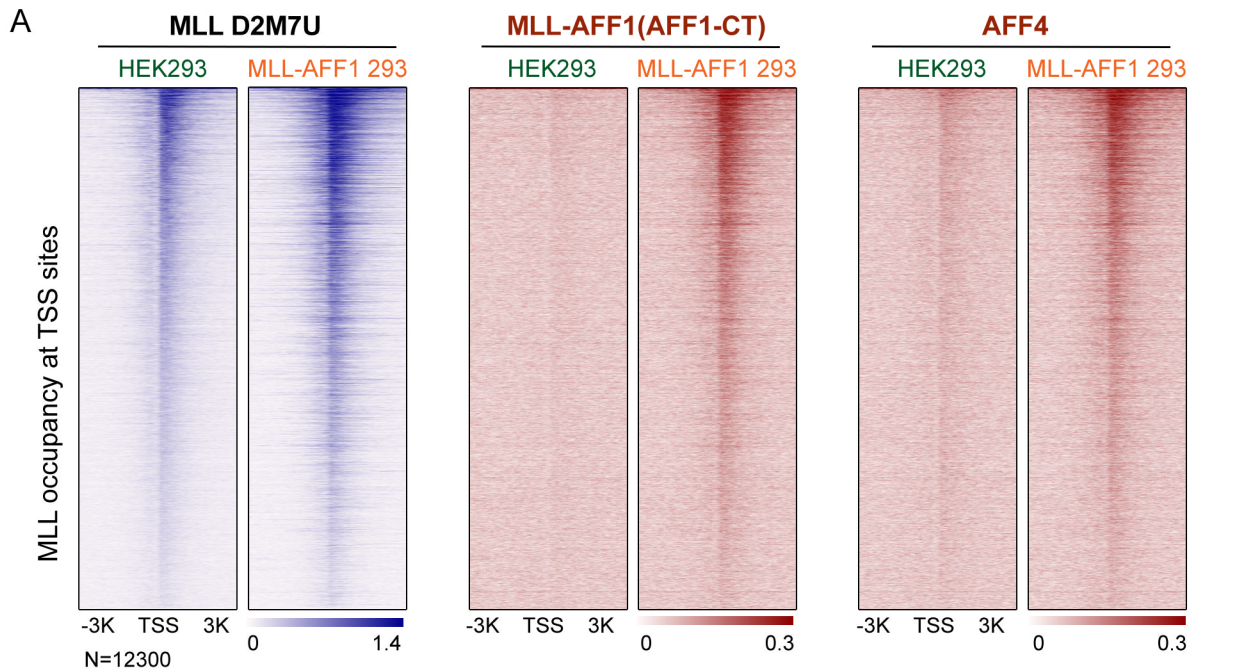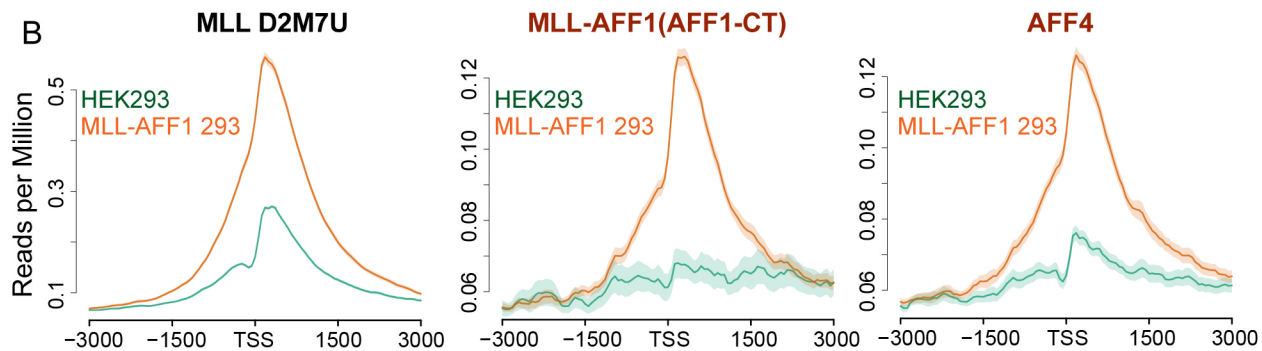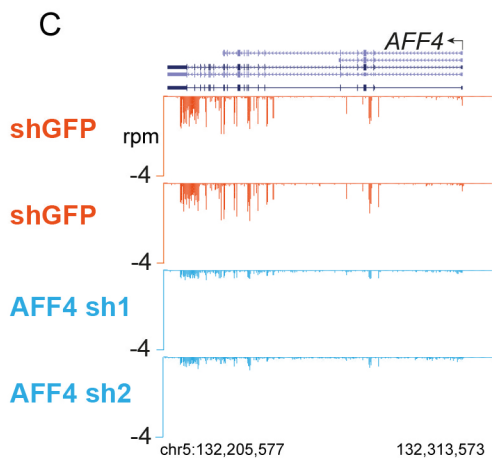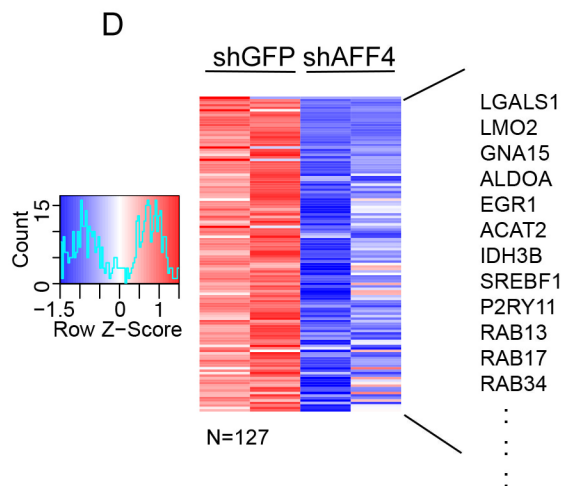

Supplement: NIHMS835871-supplement-6.pdf [file NIHMS835871-supplement-6.pdf]

A

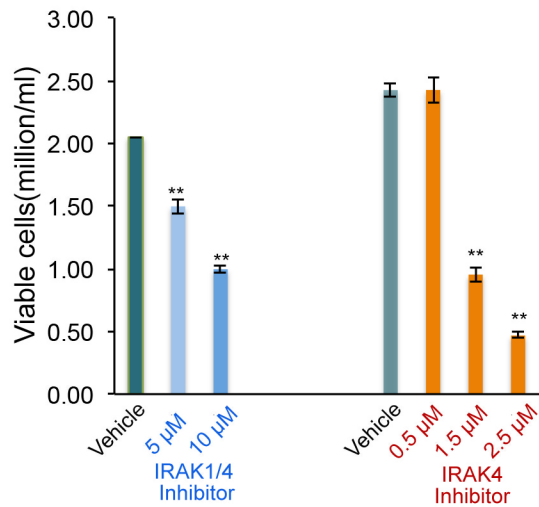

B

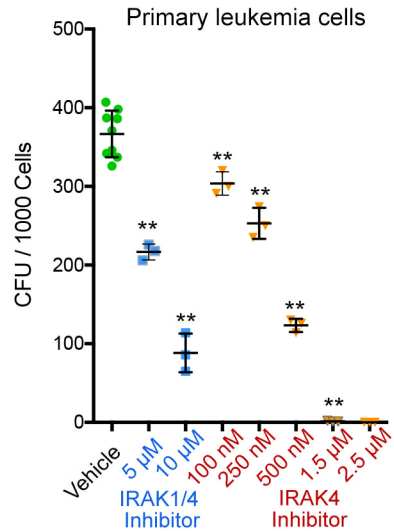

C

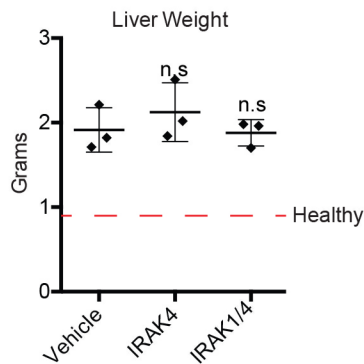

D

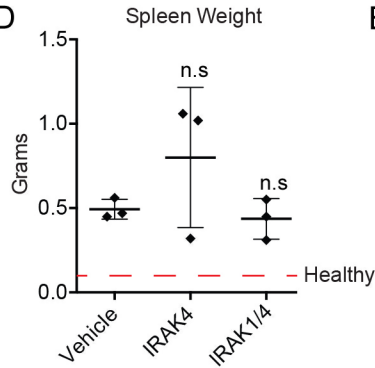

E

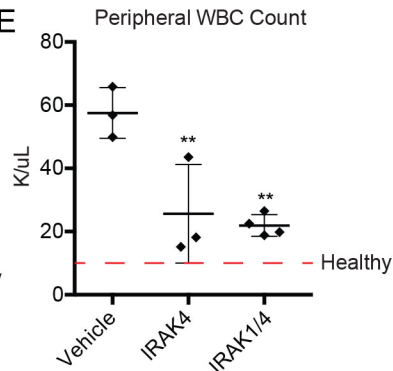

Supplement: NIHMS835871-supplement-7.pdf [file NIHMS835871-supplement-7.pdf]
